# Supplementary material for: Novel Genes and Genetic Loci Associated With Root Morphological Traits, Phosphorus-Acquisition Efficiency and Phosphorus-Use Efficiency in Chickpea
Source: Front Plant Sci. 2021 May 28;12:636973. doi: 10.3389/fpls.2021.636973 (PMC8192852; doi:10.3389/fpls.2021.636973)
Supplement: Supplementary Table 1 — Details of significant MTAs with different traits and functional annotation of SNP loci. [file Table_1.XLSX]

## Sheet: Supplementary Table 1
Supplementary Table 1: Details of significant MTAs with different traits and functional annotation of SNP loci
Trait	Statistical model	SNPs	Pseudomolecule	P-value	Phenotypic variation expalined	Allelic Effect	Effect/Impact	Gene	Feature	Description	Length	e-Value	#GO	GO IDs	GO Names	Enzyme Codes	Enzyme Names
Average branch length	FarmCPU	Ca5_3122122	Ca5	5.02009e-08	NA	synonymous variant	LOW	Ca_18689	CDS	proteoglycan 4-like	324	1.44341e-15
Average branch length	MLM	Ca5_38794469	Ca5	3.69504e-08	5.01121	synonymous variant	LOW	Ca_07430	CDS	28 kDa ribonucleoprotein, chloroplastic-like	405	4.02933e-91	5	F:GO:0003729; C:GO:0009535; P:GO:0051252; P:GO:1901259; C:GO:1990904	F:mRNA binding; C:chloroplast thylakoid membrane; P:regulation of RNA metabolic process; P:chloroplast rRNA processing; C:ribonucleoprotein complex
Average branch length	MLM	Ca8_2617846	Ca8	5.92549e-08	8.24865	missense variant	MODERATE	Ca_02320	CDS	phospholipase A1-Ibeta2, chloroplastic-like	1656	0	2	F:GO:0004620; P:GO:0006629	F:phospholipase activity; P:lipid metabolic process
Branch density	FarmCPU	Ca4_29694614	Ca4	6.41144e-10	NA	intron variant	MODIFIER	Ca_14166	mRNA	Retrovirus-related Pol polyprotein from transposon TNT 1-94	26069	0	2	F:GO:0003676; P:GO:0015074	F:nucleic acid binding; P:DNA integration
Branch density	FarmCPU	Ca6_57970784	Ca6	2.67448e-10	NA	intron variant	MODIFIER	Ca_13640	mRNA	retrotransposon-related protein	26069	2.84516e-138	5	F:GO:0003676; F:GO:0004190; P:GO:0006508; F:GO:0008270; P:GO:0015074	F:nucleic acid binding; F:aspartic-type endopeptidase activity; P:proteolysis; F:zinc ion binding; P:DNA integration
Branch intensity	FarmCPU	Ca2_6340118	Ca2	7.51106e-09	NA	missense variant	MODERATE	Ca_20930	CDS	2-aminoethanethiol dioxygenase-like protein	199	1.54718e-41	2	F:GO:0047800; P:GO:0055114	F:cysteamine dioxygenase activity; P:oxidation-reduction process	EC:1.13.11; EC:1.13.11.19	Acting on single donors with incorporation of molecular oxygen (oxygenases). The oxygen incorporated need not be derived from O(2); Cysteamine dioxygenase
Carboxylate 2	FarmCPU	Ca4_40909828	Ca4	5.93904e-08	NA			Ca_11019	mRNA	ABC1 family protein					integral component of membrane
Ci	FarmCPU	Ca7_5414752	Ca7	8.52483e-10	NA			Ca_06827	mRNA	serine/threonine-protein kinase CDL1-like				protein phosphorylation		protein kinase activity,ATP binding
Citric 2	FarmCPU	Ca4_11422181	Ca4	1.42833e-09	NA			Ca_04376	mRNA	UDP-glucose:sterol glucosyltransferase				carbohydrate metabolic process,flavonoid biosynthetic process,seed germination,seed coat development,sterol metabolic process,lipid glycosylation	vacuolar membrane	sterol 3-beta-glucosyltransferase activity	EC:2.4.1.173
Malonic 2	FarmCPU	Ca3_20026650	Ca3	4.82328e-10	NA			Ca_09405	mRNA	ethylene-overproduction protein 1-like
Manganese in mature leaf	FarmCPU	Ca2_359984	Ca2	2.04921e-09	NA	intron_variant	MODIFIER	Ca_10503	mRNA	PREDICTED: uncharacterized protein LOC101493788
Manganese in mature leaf	FarmCPU	Ca2_866639	Ca2	3.77583e-12		intron_variant	-	-	-	-	-	-	-	-	-	-	-
Manganese in mature leaf	FarmCPU	Ca2_75611437	Ca2	1.77583e-17		intron_variant	-	-	-	-	-	-	-	-	-	-	-
Manganese in mature leaf	FarmCPU	Ca4_1791932	Ca4	2.80457e-08		intron_variant	MODIFIER	Ca_07801	mRNA	zinc finger BED domain-containing protein RICESLEEPER 2-like
Manganese in mature leaf	FarmCPU	Ca4_1791932	Ca4	2.80457e-08		intron_variant	MODIFIER	Ca_07801	mRNA	zinc finger BED domain-containing protein RICESLEEPER 2-like
Manganese in mature leaf	FarmCPU	Ca7_32383349	Ca7	2.06485e-09	NA	intron_variant	MODIFIER	Ca_10040	mRNA	PHD finger protein ALFIN-LIKE 3 isoform X1					regulation of transcription, DNA-templated		histone binding,metal ion binding
Manganese in mature leaf	FarmCPU	Ca7_32386014	Ca7	3.12259e-24	NA	intron_variant	MODIFIER	Ca_10040	mRNA	PHD finger protein ALFIN-LIKE 3 isoform X1					regulation of transcription, DNA-templated		histone binding,metal ion binding
Phosporus in mature leaf	FarmCPU	Ca3_38925903	Ca3	5.22748e-09	NA			Ca_01252	mRNA	inositol phosphorylceramide glucuronosyltransferase 1-like				integral component of membrane	transferase activity, transferring glycosyl groups
Phosporus in mature leaf	FarmCPU	Ca4_13838706	Ca4	6.08257e-21	NA			Ca_04608	CDS	protein TIME FOR COFFEE			regulation of circadian rhythm	nucleus
P_Pn	FarmCPU	Ca4_35514716	Ca4	2.6019e-08	NA			Ca_22434	mRNA	HAUS augmin-like complex subunit-like protein			spindle assembly	HAUS complex
P utilisation efficiency	FarmCPU	Ca1_16163105	Ca1	2.1361e-09	NA	intron variant	MODIFIER	Ca_06938	mRNA	organic cation/carnitine transporter 4-like	3506	2.21868e-171	3	C:GO:0016021; F:GO:0022857; P:GO:0055085	C:integral component of membrane; F:transmembrane transporter activity; P:transmembrane transport
P utilisation efficiency	MLM	Ca2_31290805	Ca2	8.41913e-15	21.3317	missense variant	MODERATE	Ca_12436	CDS	hypothetical protein MTR_4g075210	384	6.47072e-30
P utilisation efficiency	MLM	Ca2_36528202	Ca2	1.5835e-16	21.1422	intron variant	MODIFIER	Ca_09841	mRNA	Brefeldin A-inhibited guanine nucleotide-exchange protein 4	15225	6.01835e-178	2	F:GO:0005086; P:GO:0032012	F:ARF guanyl-nucleotide exchange factor activity; P:regulation of ARF protein signal transduction
P utilisation efficiency	MLM	Ca3_22673996	Ca3	2.43598e-16	5.44392	intron variant	MODIFIER	Ca_06244	mRNA	uncharacterized protein LOC101493066	3404	3.11755e-43
P utilisation efficiency	MLM	Ca4_25221716	Ca4	5.92561e-15	5.04094	intron variant	MODIFIER	Ca_16564	mRNA	protein BLISTER-like isoform X4	2368	3.34019e-26	7	C:GO:0005634; C:GO:0005829; P:GO:0006355; P:GO:0009908; P:GO:0010091; P:GO:0048826; P:GO:0051781	C:nucleus; C:cytosol; P:regulation of transcription, DNA-templated; P:flower development; P:trichome branching; P:cotyledon morphogenesis; P:positive regulation of cell division	EC:3.6.1.15	Nucleoside-triphosphate phosphatase
P utilisation efficiency	MLM	Ca4_31104082	Ca4	5.92561e-15	5.04094	synonymous variant	LOW	Ca_14221	CDS	ras-related protein RABA4d	445	3.05749e-105	5	F:GO:0003924; F:GO:0005525; C:GO:0005768; P:GO:0006886; P:GO:0032482	F:GTPase activity; F:GTP binding; C:endosome; P:intracellular protein transport; P:Rab protein signal transduction
P utilisation efficiency	MLM	Ca6_2603438	Ca6	5.20522e-15	15.9063	intron variant	MODIFIER	Ca_10391	mRNA	26S proteasome non-ATPase regulatory subunit 1 homolog A	5451	0	9	F:GO:0004175; C:GO:0005634; C:GO:0008540; C:GO:0016021; F:GO:0030234; C:GO:0034515; P:GO:0042176; P:GO:0043161; P:GO:0050790	F:endopeptidase activity; C:nucleus; C:proteasome regulatory particle, base subcomplex; C:integral component of membrane; F:enzyme regulator activity; C:proteasome storage granule; P:regulation of protein catabolic process; P:proteasome-mediated ubiquitin-dependent protein catabolic process; P:regulation of catalytic activity
P utilisation efficiency	MLM	Ca6_2656781	Ca6	5.20522e-15	15.9063	intron variant	MODIFIER	Ca_10398	mRNA	mitochondrial import receptor subunit TOM40-1	4501	6.05083e-53	4	P:GO:0008152; P:GO:0009987; C:GO:0043231; C:GO:0044446	P:metabolic process; P:cellular process; C:intracellular membrane-bounded organelle; C:intracellular organelle part
P utilisation efficiency	MLM	Ca6_2771572	Ca6	5.20522e-15	15.9063	intron variant	MODIFIER	Ca_10411	mRNA	dynamin-related protein 1C	7920	5.25025e-63	2	F:GO:0005488; C:GO:0016020	F:binding; C:membrane
P utilisation efficiency	MLM	Ca6_2777944	Ca6	5.20522e-15	15.9063	intron variant	MODIFIER	Ca_10411	mRNA	dynamin-related protein 1C	7920	5.25025e-63	2	F:GO:0005488; C:GO:0016020	F:binding; C:membrane
P utilisation efficiency	MLM	Ca6_2882522	Ca6	5.20522e-15	15.9063	intron variant	MODIFIER	Ca_10426	mRNA	protein XAP5 CIRCADIAN TIMEKEEPER	3095	8.79788e-60	1	C:GO:0005634	C:nucleus
P utilisation efficiency	MLM	Ca7_29154322	Ca7	3.05172e-16	28.9112	synonymous variant	LOW	Ca_11791	CDS	uncharacterized protein LOC101491622 isoform X1	261	1.46518e-45	3	P:GO:0000012; F:GO:0003684; C:GO:0005634	P:single strand break repair; F:damaged DNA binding; C:nucleus
P utilisation efficiency	MLM	Ca7_29764519	Ca7	4.45777e-18	26.1636	intron variant	MODIFIER	Ca_11748	CDS	---NA---	90
P utilisation efficiency	MLM	Ca7_33808891	Ca7	1.08769e-15	20.2347	intron variant	MODIFIER	Ca_16189	mRNA	carboxy-terminal region remorin	2484	5.28362e-99
Physiological Phosphorus	GLM	Ca1_12310101	Ca1	5.46519e-08	11.9576	intron variant	MODIFIER	Ca_02521	CDS	fasciclin-like arabinogalactan protein 12	618	1.4966e-117	3	C:GO:0005886; P:GO:0009834; C:GO:0016021	C:plasma membrane; P:plant-type secondary cell wall biogenesis; C:integral component of membrane
Pn_mass	FarmCPU	Ca3_33589328	Ca3	3.57822e-09	NA			Ca_23666	mRNA	UDP-glucosyltransferase family protein			transferase activity, transferring hexosyl groups
Root diameter s2	FarmCPU	Ca6_42119796	Ca6	5.14662e-09	NA	intron variant	MODIFIER	Ca_21952	mRNA	serine carboxypeptidase-like 19 isoform X2	3291	7.55416e-21	3	F:GO:0004185; P:GO:0006508; C:GO:0016021	F:serine-type carboxypeptidase activity; P:proteolysis; C:integral component of membrane	EC:3.4.21; EC:3.4.16	Acting on peptide bonds (peptidases); Acting on peptide bonds (peptidases)
Subsoil root diameter	FarmCPU	Ca1_8928148	Ca1	7.20643e-14	NA	intron variant	MODIFIER	Ca_02911	mRNA	helix loop helix DNA-binding domain protein	2562	2.32412e-81	1	F:GO:0046983	F:protein dimerization activity
Topsoil root diameter	FarmCPU	Ca2_25678874	Ca2	7.46091e-12	NA	intron variant	MODIFIER	Ca_14292	mRNA	plasma membrane ATPase-like isoform X1	6909	8.94702e-148	8	F:GO:0005524; C:GO:0005623; C:GO:0005886; F:GO:0008553; C:GO:0016021; F:GO:0016787; P:GO:0051453; P:GO:0120029	F:ATP binding; C:cell; C:plasma membrane; F:proton-exporting ATPase activity, phosphorylative mechanism; C:integral component of membrane; F:hydrolase activity; P:regulation of intracellular pH; P:proton export across plasma membrane	EC:7.1.3.1; EC:7.1.2.1	n/a; n/a
Root growth rate	MLM	Ca1_4716136	Ca1	4.57868e-08	11.7785	intron variant	MODIFIER	Ca_00555	mRNA	receptor-like cytosolic serine/threonine-protein kinase RBK2	8926	7.58078e-75	10	F:GO:0004674; F:GO:0004713; F:GO:0005506; F:GO:0005524; C:GO:0005777; F:GO:0016705; P:GO:0018108; F:GO:0031418; P:GO:0046777; P:GO:0055114	F:protein serine/threonine kinase activity; F:protein tyrosine kinase activity; F:iron ion binding; F:ATP binding; C:peroxisome; F:oxidoreductase activity, acting on paired donors, with incorporation or reduction of molecular oxygen; P:peptidyl-tyrosine phosphorylation; F:L-ascorbic acid binding; P:protein autophosphorylation; P:oxidation-reduction process	EC:2.7.10; EC:2.7.11	Transferring phosphorus-containing groups; Transferring phosphorus-containing groups
Root growth rate	GLM	Ca1_4716136	Ca1	2.20632e-08	13.1321	intron variant	MODIFIER	Ca_00555	mRNA	receptor-like cytosolic serine/threonine-protein kinase RBK2	8926	2.98685e-76	3	F:GO:0004672; F:GO:0005524; P:GO:0006468	F:protein kinase activity; F:ATP binding; P:protein phosphorylation
Root growth rate	MLM	Ca3_26478729	Ca3	5.62116e-15	9.25562	intron variant	MODIFIER	Ca_08259	mRNA	nucleoside-triphosphatase-like isoform X2	3489	3.11804e-40	2	F:GO:0005524; F:GO:0016787	F:ATP binding; F:hydrolase activity
Root growth rate	MLM	Ca3_38079208	Ca3	5.30319e-08	5.04151	missense variant	MODERATE	Ca_01151	CDS	cell cycle checkpoint control protein RAD9A	109	5.16709e-16	7	P:GO:0006281; F:GO:0008408; F:GO:0008853; C:GO:0030896; P:GO:0031573; P:GO:0071479; P:GO:0090305	P:DNA repair; F:3'-5' exonuclease activity; F:exodeoxyribonuclease III activity; C:checkpoint clamp complex; P:intra-S DNA damage checkpoint; P:cellular response to ionizing radiation; P:nucleic acid phosphodiester bond hydrolysis	EC:3.1.11; EC:3.1.15; EC:3.1.11.2	Acting on ester bonds; Acting on ester bonds; Exodeoxyribonuclease III
Root growth rate	MLM	Ca3_38119001	Ca3	5.30319e-08	5.04151	intron variant	MODIFIER	Ca_01156	mRNA	Acyl-CoA-binding domain-containing protein 4	10517	2.53711e-45	2	F:GO:0000062; C:GO:0016021	F:fatty-acyl-CoA binding; C:integral component of membrane
Root growth rate	MLM	Ca3_38125395	Ca3	5.30319e-08	5.04151	intron variant	MODIFIER	Ca_01156	mRNA	Acyl-CoA-binding domain-containing protein 4	10517	2.53711e-45	2	F:GO:0000062; C:GO:0016021	F:fatty-acyl-CoA binding; C:integral component of membrane
Root growth rate	MLM	Ca3_6798755	Ca3	8.3434e-09	10.0385	intron variant	MODIFIER	Ca_16553	mRNA	Formyltetrahydrofolate deformylase 1, mitochondrial	3967	7.61042e-34	5	P:GO:0009058; F:GO:0016742; P:GO:0034641; P:GO:0044238; P:GO:1901564	P:biosynthetic process; F:hydroxymethyl-, formyl- and related transferase activity; P:cellular nitrogen compound metabolic process; P:primary metabolic process; P:organonitrogen compound metabolic process
Root growth rate	MLM	Ca7_40569843	Ca7	5.65606e-08	7.28719	intron variant	MODIFIER	Ca_20265	mRNA	flavin-containing monooxygenase FMO GS-OX5-like	5226	9.38579e-69	5	F:GO:0004499; C:GO:0016021; F:GO:0050660; F:GO:0050661; P:GO:0055114	F:N,N-dimethylaniline monooxygenase activity; C:integral component of membrane; F:flavin adenine dinucleotide binding; F:NADP binding; P:oxidation-reduction process	EC:1.14.13.8; EC:1.14.13	Flavin-containing monooxygenase; Acting on paired donors, with incorporation or reduction of molecular oxygen. The oxygen incorporated need not be derived from O(2)
Rhizosheath	FarmCPU	Ca4_15651907	Ca4	2.24398e-08	NA			Ca_05539	mRNA	amino-acid permease BAT1 homolog isoform X1	L-alanine transport,gamma-aminobutyric acid transport,L-glutamate transmembrane transport,L-lysine transmembrane transport,arginine transmembrane transport	integral component of membrane	L-glutamate transmembrane transporter activity,L-alanine transmembrane transporter activity,arginine transmembrane transporter activity,gamma-aminobutyric acid transmembrane transporter activity,L-lysine transmembrane transporter activity
Rhizosheath	FarmCPU	Ca8_230753	Ca8	1.72075e-15	NA			Ca_11919	CDS	DNA repair protein REV1	error-prone translesion synthesis	nucleus	damaged DNA binding,DNA-directed DNA polymerase activity	EC:2.7.7.7
RLRtopsub	MLM	Ca1_9032456	Ca1	6.40041e-09	12.6611	synonymous variant	LOW	Ca_02896	CDS	---NA---	52
RLRtopsub	FarmCPU	Ca7_34136332	Ca7	1.06366e-08	NA	intron variant	MODIFIER	Ca_21006	mRNA	Retrovirus-related Pol polyprotein from transposon TNT 1-94	38693	0	2	F:GO:0003676; P:GO:0015074	F:nucleic acid binding; P:DNA integration
RLs2	FarmCPU	Ca7_7683309	Ca7	1.5907e-08	NA	intron variant	MODIFIER	Ca_06591	mRNA	60S ribosomal protein L36	1462	5.09207e-36	3	P:GO:0002181; F:GO:0003735; C:GO:0022625	P:cytoplasmic translation; F:structural constituent of ribosome; C:cytosolic large ribosomal subunit
Root mass ratio	FarmCPU	Ca3_26114159	Ca3	3.86861e-08	NA	intron variant	MODIFIER	Ca_08292	mRNA	Retrovirus-related Pol polyprotein from transposon TNT 1-94	56269	0	2	F:GO:0003676; P:GO:0015074	F:nucleic acid binding; P:DNA integration
Root mass ratio	MLM	Ca1_30824547	Ca1	1.27205e-12	20.8624	intron variant	MODIFIER	Ca_25832	mRNA	putative tetraspanin/Peripherin	1819	4.20799e-85	3	C:GO:0005886; C:GO:0009506; C:GO:0016021	C:plasma membrane; C:plasmodesma; C:integral component of membrane
Root mass ratio	MLM	Ca3_36293684	Ca3	4.42154e-25	14.1232	missense variant	MODERATE	Ca_00939	CDS	CW-type zinc-finger protein	405	1.25217e-82
Root mass ratio	MLM	Ca4_37796452	Ca4	1.29829e-08	30.1229	synonymous variant	LOW	Ca_15096	mRNA	carbonyl reductase [NADPH] 1-like	2579	1.12388e-82	3	C:GO:0016020; F:GO:0047501; P:GO:0055114	C:membrane; F:(+)-neomenthol dehydrogenase activity; P:oxidation-reduction process	EC:1.1.1.208	(+)-neomenthol dehydrogenase
Root mass ratio	MLM	Ca4_44074331	Ca4	3.17704e-21	18.5039	intron variant	MODIFIER	Ca_09081	mRNA	CHD3-type chromatin-remodeling factor PICKLE	14882	2.00693e-66
Root mass ratio	MLM	Ca6_22085867	Ca6	1.73505e-08	27.8226	intron variant	MODIFIER	Ca_11229	CDS	WEB family plant protein	2334	0	1	P:GO:0007131	P:reciprocal meiotic recombination
Root mass ratio	MLM	Ca6_23390111	Ca6	2.8026e-23	17.6164	missense variant	MODERATE	Ca_11120	CDS	calcium-binding EF-hand protein	297	8.12496e-63
Root diameter	MLM	Ca5_10716879	Ca5	1.77583e-12	NA			Ca_23759	CDS	NBS-LRR protein
Root growth rate	MLM	Ca3_38082091	Ca3	1.1918e-08	3.52939	synonymous variant	LOW	Ca_01152	CDS	heavy metal-associated isoprenylated plant protein 35	944	0	2	P:GO:0030001; F:GO:0046872	P:metal ion transport; F:metal ion binding
Root growth rate	MLM	Ca6_2800524	Ca6	1.48137e-12	11.7896	intron variant	MODIFIER	Ca_10415	mRNA	E3 ubiquitin protein ligase RIE1	4210	9.94246e-63	2	C:GO:0005774; C:GO:0016021	C:vacuolar membrane; C:integral component of membrane
Root growth rate	MLM	Ca6_2863657	Ca6	1.9069e-12	10.808	synonymous variant	LOW	Ca_10423	mRNA	histone-lysine N-methyltransferase setd3-like protein	2980	4.05259e-71	4	C:GO:0009507; F:GO:0018024; P:GO:0018026; P:GO:0034968	C:chloroplast; F:histone-lysine N-methyltransferase activity; P:peptidyl-lysine monomethylation; P:histone lysine methylation	EC:2.1.1.43	Histone-lysine N-methyltransferase
Root growth rate	MLM	Ca6_56660040	Ca6	7.61203e-12	1.52662	intron variant	MODIFIER	Ca_17403	mRNA	putative leucine-rich repeat receptor-like protein kinase	3631	0	4	F:GO:0000166; C:GO:0005886; F:GO:0016301; P:GO:0016310	F:nucleotide binding; C:plasma membrane; F:kinase activity; P:phosphorylation
Root growth rate	MLM	Ca7_4811227	Ca7	8.27044e-08	2.37361	intron variant	MODIFIER	Ca_02963	mRNA	glyoxysomal fatty acid beta-oxidation multifunctional protein MFP-a-like	7102	8.12715e-162	1	F:GO:0003824	F:catalytic activity
Root tissue density	FarmCPU	Ca1_9268677	Ca1	4.58685e-10	NA	intron variant	MODIFIER	Ca_02867	mRNA	nuclear pore complex protein NUP93A-like	8945	2.19764e-150	6	C:GO:0005643; P:GO:0006606; C:GO:0016020; F:GO:0016740; P:GO:0016973; F:GO:0017056	C:nuclear pore; P:protein import into nucleus; C:membrane; F:transferase activity; P:poly(A)+ mRNA export from nucleus; F:structural constituent of nuclear pore
Root tissue density	GLM	Ca2_13459437	Ca2	6.73236e-08	14.2327	missense variant	MODERATE	Ca_11662	CDS	putative Ulp1 protease family catalytic domain, putative transposase, Ptta/En/Spm, plant	327	1.60736e-20	3	P:GO:0006508; F:GO:0008233; F:GO:0008234	P:proteolysis; F:peptidase activity; F:cysteine-type peptidase activity
Root tissue density	GLM	Ca2_25113530	Ca2	2.88296e-09	16.9535	missense variant	MODERATE	Ca_14244	CDS	protein NRT1/ PTR FAMILY 8.1-like	218	4.53097e-48	4	P:GO:0006857; C:GO:0016021; F:GO:0022857; P:GO:0055085	P:oligopeptide transport; C:integral component of membrane; F:transmembrane transporter activity; P:transmembrane transport
Root tissue density	FarmCPU	Ca2_25113530	Ca2	7.18743e-15	NA	missense variant	MODERATE	Ca_14244	CDS	protein NRT1/ PTR FAMILY 8.1-like	218	4.53097e-48	4	P:GO:0006857; C:GO:0016021; F:GO:0022857; P:GO:0055085	P:oligopeptide transport; C:integral component of membrane; F:transmembrane transporter activity; P:transmembrane transport
Shoot dry weight	MLM	Ca1_12310101	Ca1	5.53796e-08	24.1925	synonymous variant	LOW	Ca_02521	CDS	fasciclin-like arabinogalactan protein 11	618	4.04878e-144	3	C:GO:0005886; P:GO:0009834; C:GO:0016021	C:plasma membrane; P:plant-type secondary cell wall biogenesis; C:integral component of membrane
Shoot dry weight	FarmCPU	Ca2_17402458	Ca2	6.31489e-09	NA	intron variant	MODIFIER	Ca_16007	mRNA	uncharacterized protein LOC105852608	2026	0
Shoot Phosphorus content	MLM	Ca2_1397353	Ca2	8.33753e-09	41.3977	intron variant	MODIFIER	Ca_20696	mRNA	GDSL esterase/lipase At5g33370	4405	7.51451e-46	2	F:GO:0004806; C:GO:0016021	F:triglyceride lipase activity; C:integral component of membrane
Shoot Phosphorus content	MLM	Ca4_35348365	Ca4	8.1696e-09	41.1906	missense variant	MODERATE	Ca_20018	CDS	myosin-1	375	1.51534e-78	4	F:GO:0003774; F:GO:0003779; F:GO:0005524; C:GO:0016459	F:motor activity; F:actin binding; F:ATP binding; C:myosin complex
Shoot Phosphorus content	GLM	Ca4_38518152	Ca4	4.85635e-08	31.0622	intron variant	MODIFIER	Ca_13110	mRNA	NAD kinase 2, chloroplastic-like isoform X2	35794	0	4	F:GO:0003951; P:GO:0006741; P:GO:0016310; P:GO:0019674	F:NAD+ kinase activity; P:NADP biosynthetic process; P:phosphorylation; P:NAD metabolic process	EC:2.7.1.23	NAD(+) kinase
Shoot Phosphorus content	MLM	Ca4_38518152	Ca4	6.70493e-08	40.3177	intron variant	MODIFIER	Ca_13110	mRNA	NAD kinase 2, chloroplastic-like isoform X2	35794	0	4	F:GO:0003951; P:GO:0006741; P:GO:0016310; P:GO:0019674	F:NAD+ kinase activity; P:NADP biosynthetic process; P:phosphorylation; P:NAD metabolic process
Shoot Phosphorus content	GLM	Ca4_38667309	Ca4	2.76793e-08	31.4999	intron variant	MODIFIER	Ca_13100	mRNA	small RNA degrading nuclease 5 isoform X1	6904	2.07735e-91	3	F:GO:0003676; F:GO:0004527; C:GO:0005634	F:nucleic acid binding; F:exonuclease activity; C:nucleus
Shoot Phosphorus content	GLM	Ca4_8269508	Ca4	5.9799e-09	32.7744	intron variant	MODIFIER	Ca_08315	mRNA	piezo-type mechanosensitive ion channel homolog isoform X2	31238	0	1	C:GO:0016021	C:integral component of membrane
Shoot Phosphorus content	MLM	Ca4_8269508	Ca4	5.23037e-09	32.9102	intron variant	MODIFIER	Ca_08315	mRNA	piezo-type mechanosensitive ion channel homolog isoform X2	31238	0	1	C:GO:0016021	C:integral component of membrane
Shoot Phosphorus content	MLM	Ca6_57141812	Ca6	2.8564e-09	27.6716	intron variant	MODIFIER	Ca_17439	mRNA	Retrovirus-related Pol polyprotein from transposon TNT 1-94	24073	0	5	F:GO:0003676; F:GO:0004491; F:GO:0008270; P:GO:0015074; P:GO:0055114	F:nucleic acid binding; F:methylmalonate-semialdehyde dehydrogenase (acylating) activity; F:zinc ion binding; P:DNA integration; P:oxidation-reduction process	EC:1.2.1.27	Methylmalonate-semialdehyde dehydrogenase (CoA acylating)
Shoot Phosphorus content	MLM	Ca6_57141812	Ca6	7.65418e-08	39.0082	intron variant	MODIFIER	Ca_17439	mRNA	Retrovirus-related Pol polyprotein from transposon TNT 1-94	24073	0	6	C:GO:0000943; F:GO:0003676; F:GO:0004491; F:GO:0008270; P:GO:0015074; P:GO:0055114	C:retrotransposon nucleocapsid; F:nucleic acid binding; F:methylmalonate-semialdehyde dehydrogenase (acylating) activity; F:zinc ion binding; P:DNA integration; P:oxidation-reduction process
Shoot Phosphorus content	MLM	Ca7_32434358	Ca7	5.15242e-08	40.0186	intron variant	MODIFIER	Ca_10035	mRNA	protein Brevis radix-like 2	4199	4.78427e-75
Specific	FarmCPU	Ca7_9851865	Ca7	2.97048e-08	NA			Ca_12751	mRNA	protein transport protein SEC16B homolog	protein transport,COPII vesicle coating	Golgi membrane,endoplasmic reticulum
Specific root length	MLM	Ca1_8712480	Ca1	1.88846e-10	17.5555	missense variant	MODERATE	Ca_02941	CDS	4-coumarate--CoA ligase 1	1068	0	2	C:GO:0016021; F:GO:0016874	C:integral component of membrane; F:ligase activity
Specific root length	GLM	Ca1_8712480	Ca1	2.48828e-09	20.3148	missense variant	MODERATE	Ca_02941	CDS	4-coumarate--CoA ligase 1	1068	0	2	C:GO:0016021; F:GO:0016874	C:integral component of membrane; F:ligase activity
Specific root length	GLM	Ca1_9361018	Ca1	5.94844e-08	17.2069	intron variant	MODIFIER	Ca_02864	mRNA	embryo-specific protein	1241	1.94436e-50
Specific root length	FarmCPU	Ca2_31056078	Ca2	6.46118e-10	NA	intron variant	MODIFIER	Ca_03107	mRNA	sister chromatid cohesion 1 protein 1	9903	7.81257e-29	4	C:GO:0000798; F:GO:0003682; P:GO:0006302; P:GO:0007062	C:nuclear cohesin complex; F:chromatin binding; P:double-strand break repair; P:sister chromatid cohesion
Specific root length	FarmCPU	Ca5_27170245	Ca5	4.06256e-09	NA			Ca_08923	mRNA	PREDICTED: uncharacterized protein LOC101506096 isoform X3
Specific root length	MLM	Ca7_3606123	Ca7	1.44706e-09	17.6372	intron variant	MODIFIER	Ca_03107	mRNA	pectinesterase/pectinesterase inhibitor PPE8B	2672	1.73086e-163	8	C:GO:0005576; C:GO:0005618; F:GO:0030599; P:GO:0042545; P:GO:0043086; F:GO:0045330; P:GO:0045490; F:GO:0046910	C:extracellular region; C:cell wall; F:pectinesterase activity; P:cell wall modification; P:negative regulation of catalytic activity; F:aspartyl esterase activity; P:pectin catabolic process; F:pectinesterase inhibitor activity	EC:3.1.1.11; EC:3.1.1.1	Pectinesterase; Carboxylesterase
Specific root length	GLM	Ca7_3606123	Ca7	2.979e-08	17.8725	intron variant	MODIFIER	Ca_03107	mRNA	pectinesterase/pectinesterase inhibitor PPE8B	2672	1.73086e-163	8	C:GO:0005576; C:GO:0005618; F:GO:0030599; P:GO:0042545; P:GO:0043086; F:GO:0045330; P:GO:0045490; F:GO:0046910	C:extracellular region; C:cell wall; F:pectinesterase activity; P:cell wall modification; P:negative regulation of catalytic activity; F:aspartyl esterase activity; P:pectin catabolic process; F:pectinesterase inhibitor activity	EC:3.1.1.11; EC:3.1.1.1	Pectinesterase; Carboxylesterase
Specific root length	FarmCPU	Ca7_3606123	Ca7	2.99746e-11	NA	intron variant	MODIFIER	Ca_03107	mRNA	pectinesterase/pectinesterase inhibitor PPE8B	2672	1.73086e-163	8	C:GO:0005576; C:GO:0005618; F:GO:0030599; P:GO:0042545; P:GO:0043086; F:GO:0045330; P:GO:0045490; F:GO:0046910	C:extracellular region; C:cell wall; F:pectinesterase activity; P:cell wall modification; P:negative regulation of catalytic activity; F:aspartyl esterase activity; P:pectin catabolic process; F:pectinesterase inhibitor activity	EC:3.1.1.11; EC:3.1.1.1	Pectinesterase; Carboxylesterase
Total rhizo dry soil (g plant-1)	MLM	Ca1_335686	Ca1	2.90447e-13	NA			Ca_00033	mRNA	probable ion channel SYM8	nodulation,ion transmembrane transport	integral component of membrane,nuclear membrane	identical protein binding
Total rhizo dry soil (g plant-1)	MLM	Ca2_31290805	Ca2	1.2928e-14	NA			Ca_12436	CDS	hypothetical protein MTR_4g075210
Total rhizo dry soil (g plant-1)	MLM	Ca5_10716879	Ca5	5.66977e-17	NA			Ca_23759	CDS	NBS-LRR protein
Total rhizo dry soil (g plant-1)	MLM	Ca8_11269657	Ca8	1.34932e-11	NA			Ca_16831	CDS	putative pentatricopeptide repeat-containing protein At1g12700, mitochondrial
Total rhizo dry soil	MLM	Ca8_11319789	Ca8	1.34932e-11	NA			Ca_16825	CDS	putative pentatricopeptide repeat-containing protein At1g12700, mitochondrial
Total rhizo dry soil	MLM	Ca8_11347342	Ca8	1.34932e-11	NA			Ca_16823	CDS	putative pentatricopeptide repeat-containing protein At1g12700, mitochondrial
Total shoot Phosphorus	FarmCPU	Ca1_12310101	Ca1	1.68608e-13	NA	synonymous variant	LOW	Ca_02521	CDS	fasciclin-like arabinogalactan protein 12	618	1.4966e-117	3	C:GO:0005886; P:GO:0009834; C:GO:0016021	C:plasma membrane; P:plant-type secondary cell wall biogenesis; C:integral component of membrane
Taproot length zone 1	MLM	Ca3_6798755	Ca3	7.15875e-08	13.5982	intron variant	MODIFIER	Ca_16553	mRNA	formyltetrahydrofolate deformylase 1, mitochondrial-like	3967	2.40314e-40	5	P:GO:0009058; F:GO:0016740; P:GO:0034641; P:GO:0044238; P:GO:1901564	P:biosynthetic process; F:transferase activity; P:cellular nitrogen compound metabolic process; P:primary metabolic process; P:organonitrogen compound metabolic process
Taproot length zone 2	MLM	Ca6_2959348	Ca6	1.48662e-11	9.64432	synonymous variant	LOW	Ca_10438	mRNA	LEAF RUST 10 DISEASE-RESISTANCE LOCUS RECEPTOR-LIKE PROTEIN KINASE-like 2.5	3942	0	6	F:GO:0004672; F:GO:0005524; P:GO:0006468; F:GO:0008889; C:GO:0016021; F:GO:0030247	F:protein kinase activity; F:ATP binding; P:protein phosphorylation; F:glycerophosphodiester phosphodiesterase activity; C:integral component of membrane; F:polysaccharide binding	EC:3.1.4.46	Glycerophosphodiester phosphodiesterase
Water use efficency	FarmCPU	Ca6_56627040	Ca6	2.80445e-11	NA	-	-	Ca_17398	mRNA	proline dehydrogenase	-	-	-	-	proline catabolic process,oxidation-reduction process	EC:1.5.99.8
Water use efficiency	FarmCPU	Ca7_5414752	Ca7	1.853e-08	NA	-	-	Ca_06827	mRNA	serine/threonine-protein kinase CDL1-like	-	-	-	-	protein phosphorylation		protein kinase activity,ATP binding
